# Supplementary material for: Recovery of NH4+–N and PO43−–P from urine using sludge-derived biochar as a fertilizer: performance and mechanism
Source: Royal Society of Chemistry journal article supplement (doi:10.1039/d1ra08558a), 2022-01-01
Supplement: d1ra08558a1.pdf [file d1ra08558a1.pdf]

## Supplementary data

### Recovery $\text{NH}_4^+$ -N and $\text{PO}_4^{3-}$ -P from urine using sludge-derived biochar as a fertilizer: Performance and Mechanism

Chaoyang Yu<sup>1,2,\*</sup>

<sup>1</sup> College of Architecture and Environment, Sichuan University, Chengdu 610041, China

<sup>2</sup> Sichuan-tibet Railway Co., Ltd, Chengdu 610041, China

\* Correspondence: wtu77\_001@163.com

Table S1 Basic properties of soils.

| pH   | Organic<br>matter (g/kg) | Total Pb<br>(mg/kg) | Total Cd<br>(mg/kg) | Toatal<br>Cr (mg/kg) |
|------|--------------------------|---------------------|---------------------|----------------------|
| 6.12 | 32.51                    | 10.23               | 0.51                | 3.64                 |

Table S2 The fitting parameters of Intra-particle diffusion model.

|      |       | Intra-particle diffusion model |       |         |       |       |         |       |       |         |
|------|-------|--------------------------------|-------|---------|-------|-------|---------|-------|-------|---------|
|      |       | $k_1$                          | $C_1$ | $R^2_1$ | $k_2$ | $C_2$ | $R^2_2$ | $k_3$ | $C_3$ | $R^2_3$ |
|      | BS300 | 2.88                           | 12.71 | 0.999   | 1.67  | 26.21 | 0.989   | 0.07  | 62.13 | 0.972   |
| NH+  | BS400 | 3.77                           | 14.47 | 0.971   | 2.13  | 27.79 | 0.989   | 0.06  | 78.86 | 0.948   |
| 4-H  | BS500 | 3.58                           | 19.32 | 0.980   | 1.94  | 36.90 | 0.998   | 0.27  | 76.91 | 0.956   |
|      | BS600 | 4.33                           | 16.61 | 0.979   | 1.98  | 52.05 | 0.991   | 0.29  | 94.32 | 0.992   |
|      | BS300 | 0.80                           | 2.58  | 0.982   | 0.88  | 0.19  | 0.999   | 0.06  | 19.03 | 0.913   |
| PO3- | BS400 | 0.84                           | 4.67  | 0.992   | 0.54  | 8.80  | 0.957   | 0.06  | 20.27 | 0.896   |
| 4-P  | BS500 | 1.12                           | 8.27  | 0.988   | 0.57  | 12.61 | 0.955   | 0.02  | 25.10 | 0.965   |
|      | BS600 | 1.13                           | 11.01 | 0.988   | 0.56  | 16.72 | 0.999   | 0.05  | 28.21 | 0.999   |

Table S3 Comparison of the adsorption capacity of different biochar for Ni(II)

|                                                               |                           | Pyrolysis temperature | Experimental conditions         | $Q_{\max}$ | References |
|---------------------------------------------------------------|---------------------------|-----------------------|---------------------------------|------------|------------|
| Biochar derived from <i>Erythrina Variegata</i>               | NH <sup>+</sup> 4-<br>H   | 700                   | pH=7.0, 303 K, Aqueous solution | 3.03       | 1          |
|                                                               | PO <sub>3</sub> - 4-<br>P | 700                   | pH=7.0, 303 K, Aqueous solution | 3.05       |            |
| Unfermented sludge based biochar                              | NH <sup>+</sup> 4-<br>H   | 700                   | /, 298K, Aqueous solution       | 11.91      | 2          |
|                                                               | PO <sub>3</sub> - 4-<br>P | 700                   | /, 298K, Aqueous solution       | 9.32       |            |
| Fermented sludge based biochar                                | NH <sup>+</sup> 4-<br>H   | 700                   | /, 298K, Aqueous solution       | 22.04      | 2          |
|                                                               | PO <sub>3</sub> - 4-<br>P | 700                   | /, 298K, Aqueous solution       | 8.17       |            |
| $\alpha$ -Fe <sub>2</sub> O <sub>3</sub> and activated carbon | PO <sub>3</sub> - 4-<br>P | /                     | pH=6.8, 298K, Urine             | 5.87       | 3          |
| Bamboo leaf biochar                                           | NH <sup>+</sup> 4-<br>H   | 600                   | /, 298K, Aqueous solution       | 22.92      | 4          |
|                                                               | PO <sub>3</sub> - 4-<br>P | 600                   | /, 298K, Aqueous solution       | 37.34      |            |
| Panda manure biochar                                          | NH <sup>+</sup> 4-<br>H   | 600                   | /, 298K, Aqueous solution       | 37.34      | 4          |
|                                                               | PO <sub>3</sub> - 4-<br>P | 600                   | /, 298K, Aqueous solution       | 62.99      |            |
| BS600                                                         | NH <sup>+</sup> 4-<br>H   | 600                   | pH=6.92, 298K, Urine            | 114.71     | This work  |
|                                                               | PO <sub>3</sub> - 4-<br>P | 600                   | pH=6.92, 298K, Urine            | 30.29      |            |

Table S4 Content of heavy metals in pakchoi cabbage (mg/kg).

|                                                              | Pb   | Cr   | Cd   | As  | Ni  | Zn   | Cu        |
|--------------------------------------------------------------|------|------|------|-----|-----|------|-----------|
| BS300                                                        | 0.08 | 0.06 | ND   | ND  | ND  | 1.67 | 0.86      |
| BS400                                                        | 0.02 | ND   | ND   | ND  | ND  | 1.01 | 0.75      |
| BS500                                                        | ND   | ND   | ND   | ND  | ND  | 0.77 | 0.44      |
| BS600                                                        | ND   | ND   | ND   | ND  | ND  | 0.34 | 0.06      |
| Adsorbed BS300                                               | 0.03 | 0.01 | ND   | ND  | ND  | 1.12 | 0.77      |
| Adsorbed BS400                                               | 0.01 | ND   | ND   | ND  | ND  | 0.86 | 0.54      |
| Adsorbed BS500                                               | ND   | ND   | ND   | ND  | ND  | 0.51 | 0.15      |
| Adsorbed BS600                                               | ND   | ND   | ND   | ND  | ND  | 0.11 | ND        |
| Vegetable heavy metal content testing standards (GB14935-94) | 0.2  | 0.5  | 0.05 | 0.5 | 0.6 | 20   | 10        |
| ND                                                           | =    |      | No   |     |     |      | detected. |

Table S5 Leaching concentration of heavy metals in soil after pot experiment (mg/L)

| Soil sample                                                                                                    | Pb   | Cr   | Cd   | As   | Ni   | Zn   | Cu   |
|----------------------------------------------------------------------------------------------------------------|------|------|------|------|------|------|------|
| BS300                                                                                                          | 1.39 | 1.02 | 0.15 | 0.37 | 0.51 | 7.98 | 5.57 |
| BS400                                                                                                          | 1.08 | 0.67 | 0.03 | ND   | 0.23 | 4.39 | 2.73 |
| BS500                                                                                                          | 0.51 | 0.22 | ND   | ND   | ND   | 2.64 | 1.05 |
| BS600                                                                                                          | 0.12 | 0.01 | ND   | ND   | ND   | 1.58 | 0.34 |
| Adsorbed BS300                                                                                                 | 1.01 | 0.94 | 0.05 | 0.13 | 0.24 | 6.68 | 5.54 |
| Adsorbed BS400                                                                                                 | 0.74 | 0.35 | ND   | ND   | 0.03 | 2.48 | 3.19 |
| Adsorbed BS500                                                                                                 | 0.24 | 0.11 | ND   | ND   | ND   | 1.21 | 1.24 |
| Adsorbed BS600                                                                                                 | 0.05 | ND   | ND   | ND   | ND   | 0.56 | 0.21 |
| Identification standards for<br>hazardous wastes-Identification for<br>extraction toxicity<br>(GB 5085.3-2007) | 5    | 15   | 1    | 5    | 5    | 100  | 100  |

ND = Not detected.

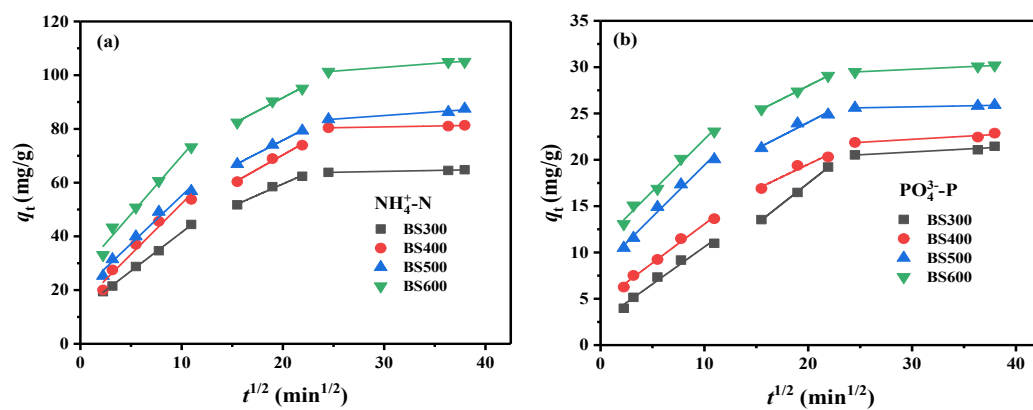

Fig. S1 Intra-particle diffusion model of sludge-derived biochar for  $\text{NH}_4^+-\text{N}$  (a) and  $\text{PO}_4^{3--}\text{P}$  (b) removal.

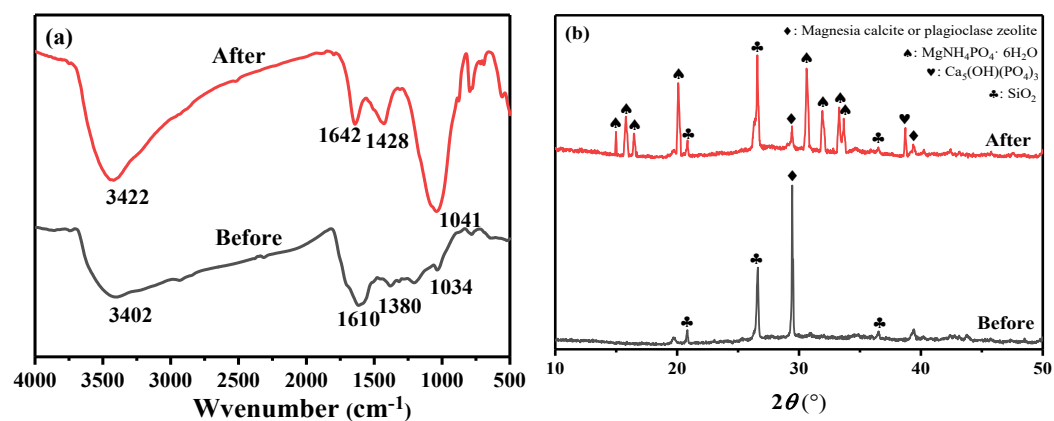

Fig. S2 FTIR (a) and XRD (b) analysis of BS600 after adsorption of  $\text{NH}_4^+$  4-N and  $\text{PO}_3^-$  4-P from urine.

1. X. Liu, H. Y. Nan and Q. An, *J. Agr. Res. Environ*, 2017, **35**, 66-73.
2. W. F. Cheng, H. Li, Y. Q. Yang, B. Yin and H. B. Liu, *CIESC J*, 2016, **67**, 1541-1548.
3. Y. Y. Jiao, S. K. Zhou, L. C. Zhang, W. D. Ai, S. Kang, C. L. Li, L. B. Zheng and Y. S. Wei, *Chem. Ind. Eng. Prog*, 2021, **40**, 2347-2356.
4. M. J. Wang, S. K. Hu, Q. G. Wang, Y. Liang, C. R. Liu, H. Xu and Q. Ye, *J. Clean. Prod.*, 2020, **291**, 125221.
